# Supplementary material
Source: PubMed Central journal article supplement (PMC6547253)
Supplement: jamapsychiatry-76-1063-s001.pdf [file jamapsychiatry-76-1063-s001.pdf]

## Supplementary Online Content

Winkelbeiner S, Leucht S, Kane JM, Homan P. Evaluation of differences in individual treatment response in schizophrenia spectrum disorders: a meta-analysis. *JAMA Psychiatry*. Published online June 3, 2019. doi:10.1001/jamapsychiatry.2019.1530

### eResults

**eFigure 1.** No Associations Between Means and SDs

**eFigure 2.** Variability for Treatment vs Control Across All Investigated Antipsychotic Drugs

This supplementary material has been provided by the authors to give readers additional information about their work.

## eResults

For the studies we had access to, 26 (35%) used an analysis of covariance model, 1 (1%) a mixed model for repeated measures, 25 (33%) an analysis of variance, and 8 (11%) a constrained longitudinal data analysis, whereas information was not available from 15 (20%) studies.

The models included covariates of which ‘baseline’ was the most frequent in 43 (57%) comparisons followed by ‘center’ in 25 (33%), ‘baseline-by-visit’ in 25 (33%), ‘body weight’ in 25 (33%), ‘age’ in 25 (33%), ‘height’ in 25 (33%), ‘duration of hospitalization’ in 25 (33%), ‘number of hospitalization’ in 25 (33%), and ‘age at onset’ in 25 (33%).

**eFigure 1.** No Associations Between Means and SDs

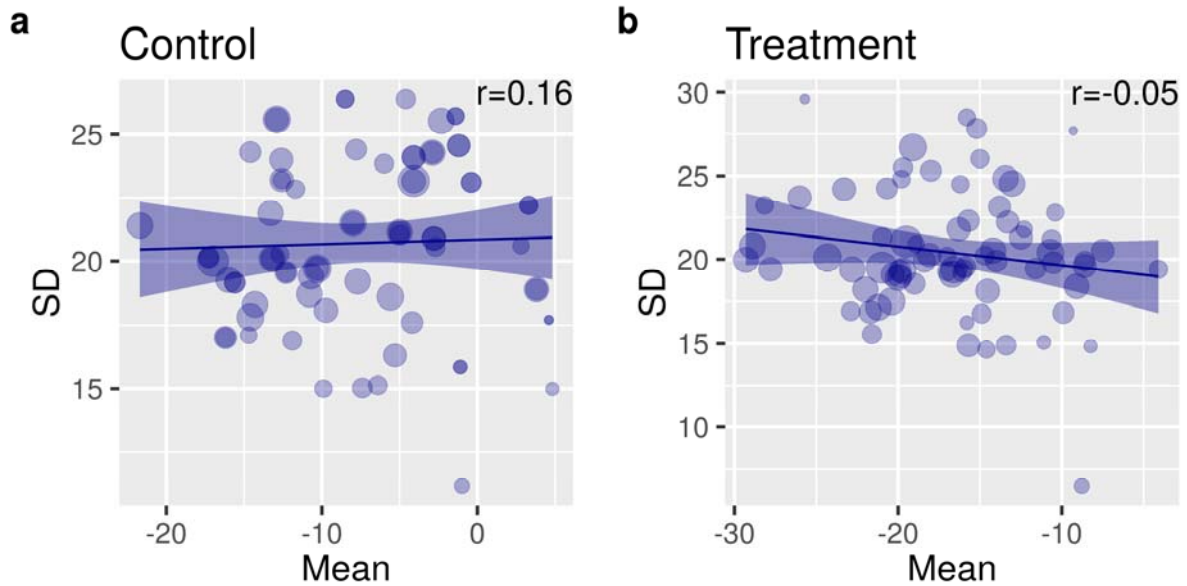

a, b. The mean pretreatment and posttreatment difference scores were not significantly associated with the SDs across studies for control ( $\beta = 0.16$ ;  $P = .15$ ) or for treatment ( $\beta = -0.05$ ;  $P = .62$ ).

**eFigure 2.** Variability for Treatment vs Control Across All Investigated Antipsychotic Drugs

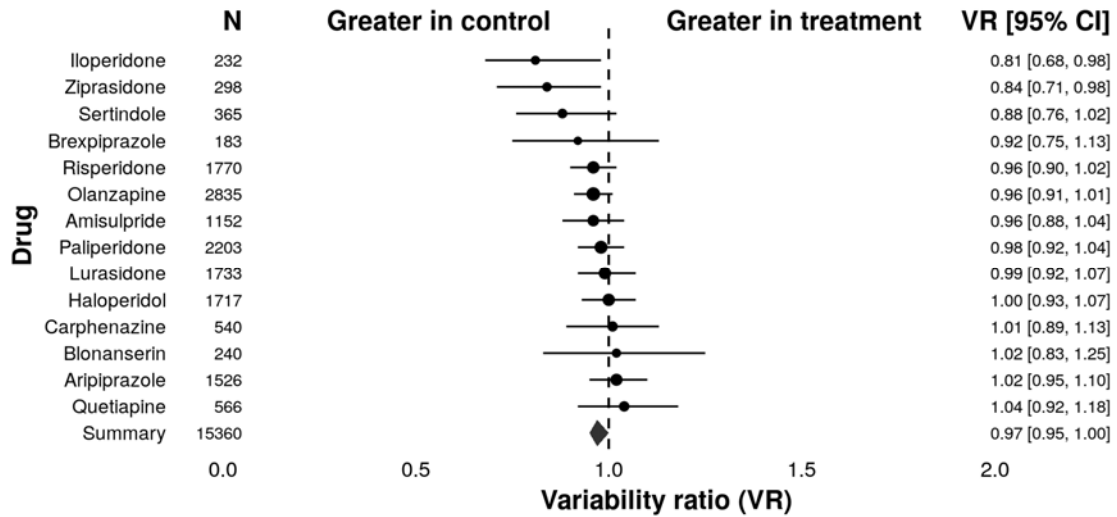

The forest plot shows the result of a random-effects model of the variability ratio (VR) of treatment versus control across all investigated antipsychotic drugs (VR = 0.97; 95% CI, 0.95; 1.00;  $P = .02$ ). The size of the dots reflects the sample size of the respective study. N, number of patients.
